# Supplementary material for: High-Resolution Ion-Flux Imaging of Proton Transport through Graphene|Nafion Membranes
Source: PubMed Central journal article supplement (PMC9047657; doi:10.1021/acsnano.1c05872), 2022-03-14
Supplement: nn1c05872_si_005.pdf [file nn1c05872_si_005.pdf]

*Supporting Information for:*

# High-Resolution Ion-Flux Imaging of Proton Transport through Graphene | Nafion Membranes

*Cameron L. Bentley,<sup>†,‡,\*</sup> Minkyung Kang,<sup>‡</sup> Saheed Bukola,<sup>§</sup> Stephen E. Creager<sup>§</sup> and Patrick R.*

*Unwin<sup>‡,\*</sup>*

<sup>†</sup>School of Chemistry, Monash University, Clayton, Victoria 3800, Australia

<sup>‡</sup>Department of Chemistry, University of Warwick, Coventry CV4 7AL, United Kingdom

<sup>§</sup>Department of Chemistry, Clemson University, Clemson, South Carolina 29634, United

States

\*E-mail: [cameron.bentley@monash.edu](mailto:cameron.bentley@monash.edu) (C.L.B.); [p.r.unwin@warwick.ac.uk](mailto:p.r.unwin@warwick.ac.uk) (P.R.U.)

## Contents

|                                                               |    |
|---------------------------------------------------------------|----|
| ASSESSING THE QUALITY OF GRAPHENE AS A WORKING ELECTRODE..... | 3  |
| LOCAL PROTON CONDUCTION MECHANISMS.....                       | 5  |
| MOVIE CAPTIONS.....                                           | 6  |
| TOPOGRAPHICAL MAPS.....                                       | 7  |
| OVERPOTENTIAL, CAPACITANCE AND RC TIME CONSTANT .....         | 9  |
| EQUIVALENT CIRCUIT: ION TRANSPORT THROUGH A NANOPORE .....    | 11 |
| MACROSCOPIC AREAL CONDUCTIVITY OF GRAPHENE MEMBRANES .....    | 15 |
| ELECTRON MICROSCOPY IMAGES OF SECCM PROBES .....              | 16 |
| XPS CHARACTERIZATION OF GRAPHENE NAFION MEMBRANES .....       | 17 |
| SI REFERENCES .....                                           | 18 |

## ASSESSING THE QUALITY OF GRAPHENE AS A WORKING ELECTRODE

In order to assess the quality of the graphene overlayer film as a working electrode (WE), we studied the electrochemistry of the outer-sphere  $\text{FcDM}^{0/+}$  ( $\text{FcDM}$  = ferrocendimethanol) process using the same dual-channel scanning electrochemical cell microscopy (SECCM) set up<sup>1, 2</sup> as for the proton transmission measurements. As shown in Figure S1a, in this configuration, the potential ( $E_{\text{surf}}$ ) at the graphene WE surface (directly connected to the electrometer, rather than floating, as in the main text), was controlled through the applied potential ( $E_{\text{app}}$ ) via:  $E_{\text{surf}} = -(E_{\text{app}} + E_{\text{bias}}/2)$ , as described in the main text. The employed dual-channel probe had a tip radius ( $r_{\text{tip}}$ ) of *ca.* 100 nm (Figure S1a, inset), and during measurement, was equipped with Ag/AgCl quasi-reference counter electrodes (QRCEs) and filled with an aqueous solution of 1.3 mM  $\text{FcDM}$  + 12.5 mM HCl.

Linear-sweep voltammograms (LSVs), obtained in the SECCM format on graphene and GC WEs, shown in Figure S1c, are sigmoidal in shape, indicating (near-)steady-state behaviour,<sup>1</sup> with mass-transport limiting currents ( $i_{\text{lim}}$ ) of  $\approx 3.2$  pA.  $\text{FcDM}^{0/+}$  is an apparently ideal (Nernstian) process on both materials, evidenced by:  $E_{1/2} \approx E^{0'} \approx 0.15$  V [where  $E_{1/2}$  is the potential where  $i = i_{\text{lim}}/2$  and;  $E^{0'}$  is the formal reversible potential, estimated by macroscopic cyclic voltammetry, not shown] and;  $|E_{3/4} - E_{1/4}| \approx 57$  mV (where  $E_{3/4}$  and  $E_{1/4}$  are the potentials where  $i = 3 \cdot i_{\text{lim}}/4$  and  $i = i_{\text{lim}}/4$ , respectively), satisfying Tomes criterion of reversibility.<sup>3</sup> Assuming an upper limit of detection of the heterogeneous electron-transfer rate constant ( $k^0$ )  $\approx 5 \cdot k_m \approx D/(2r_{\text{tip}})$ , where  $k_m$  is the mass-transfer coefficient [ $\approx D/(10r_{\text{tip}})$  in the SECCM configuration] and  $D$  is the diffusion coefficient of  $\text{FcDM}$  ( $\approx 8 \cdot 10^{-6}$  cm<sup>2</sup> s<sup>-1</sup>);  $k^0 \geq 0.04$  cm s<sup>-1</sup> on both graphene and GC.<sup>4</sup> This effectively demonstrates that the graphene prepared as described herein is usable as a WE that supports facile electron-tunnelling, in agreement with previous reports.<sup>5</sup>

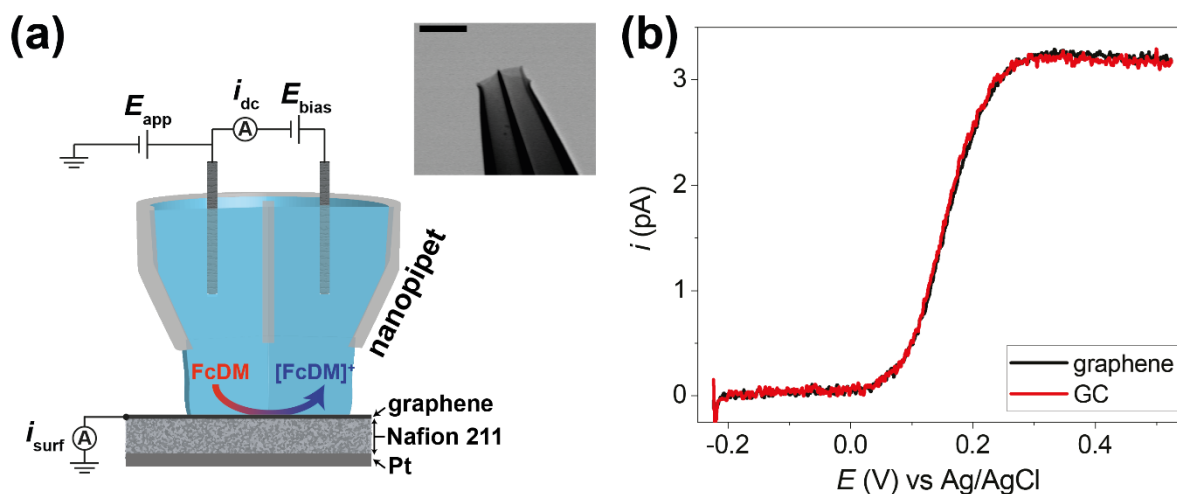

**Figure S1. (a)** Schematic of the SECCM set up employed to assess the quality of graphene as a working electrode. The dual-channel nanopipet probe is filled with electrolyte solution (1.3 mM FcDM + 12.5 mM HCl) and equipped with identical Ag/AgCl QRCEs. During operation,  $E_{\text{bias}}$  is applied between the QRCEs and the resulting  $i_{\text{dc}}$  is used as a feedback signal to detect meniscus-surface contact. A potential of  $E_{\text{app}}$  was applied to one of the QRCEs to control the graphene WE potential ( $E_{\text{surf}}$ ), where  $E_{\text{surf}} = -(E_{\text{app}} + E_{\text{bias}}/2)$  and the WE current ( $i_{\text{surf}}$ ) was measured. Note that in this configuration, the Nafion membrane simply serves as a support for the graphene WE and the underlying Pt electrode was floating (*i.e.*, it was neither biased nor electrically grounded). Inset is a scanning tunnelling electron microscopy (STEM) image of the employed nanopipet tip. **(b)** Representative LSVs (voltammetric scan rate,  $\nu = 0.2 \text{ V s}^{-1}$ ) obtained from the  $\text{FcDM}^{0/+}$  process on graphene (black trace) and GC (red trace) WE substrates in the SECCM configuration [shown in (a)]. These curves are the average of 10 independent measurements carried out at randomly selected spots across the respective WE surfaces.

## LOCAL PROTON CONDUCTION MECHANISMS

(a) intrinsic (through-plane)  $H^+$  conduction

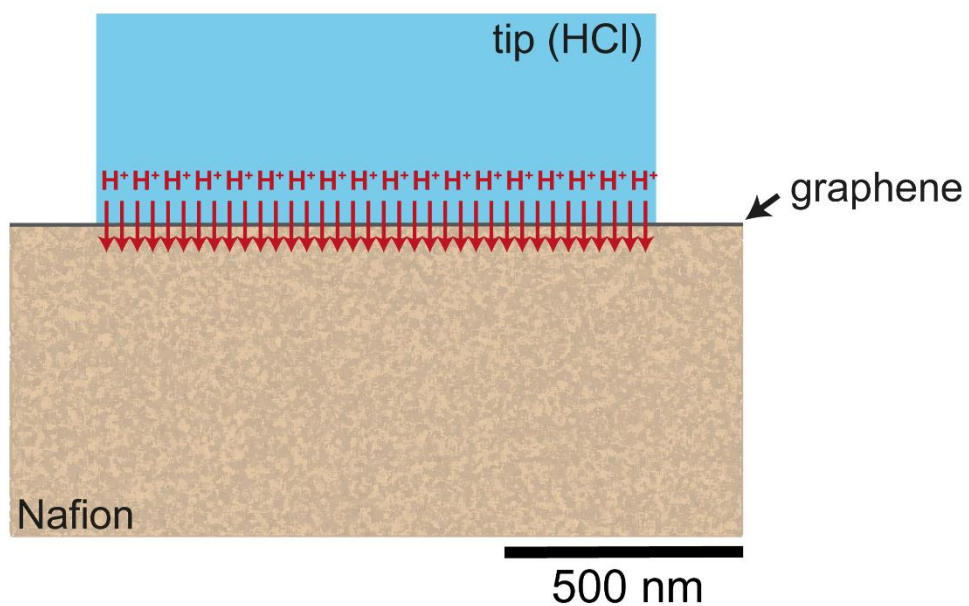

(b) defect-driven  $H^+$  conduction

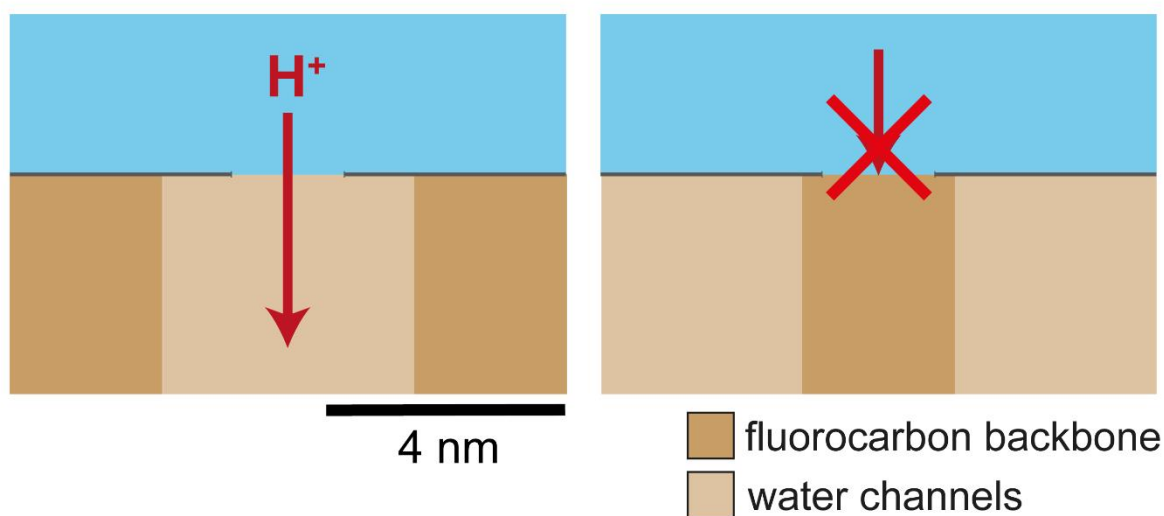

**Figure S2.** Scheme showing (a) intrinsic (through-plane) and (b) defect-driven proton ( $H^+$ ) conduction mechanisms. Note the differing scales.

## MOVIE CAPTIONS

**Movie S1.** Spatially-resolved electrochemical (*current–voltage, i–E*) movie (51 × 51 pixels over a 100 × 100 μm<sup>2</sup> area, hopping distance = 2 μm) obtained with the voltammetric ( $\nu = 0.1 \text{ V s}^{-1}$ , 1 cycle) hopping mode SECCM configuration (shown in the main text, Figure 1), visualizing local proton transmission through a graphene|Nafion membrane. The micropipet probe (tip area ≈ 1 μm<sup>2</sup>) was equipped with Ag/AgCl QRCEs and filled with 0.1 M HCl. Data extracted from Movie S1 were used to construct Figure 2a in the main text. The data presented are not interpolated.

**Movie S2.** Spatially-resolved electrochemical (*i–E*) movie (51 × 51 pixels over a 100 × 100 μm<sup>2</sup> area, hopping distance = 2 μm) obtained with the voltammetric ( $\nu = 0.2 \text{ V s}^{-1}$ , 2 cycles) hopping mode SECCM configuration (shown in the main text, Figure 1), visualizing local proton transmission through a graphene|Nafion membrane. The micropipet probe (tip area ≈ 1 μm<sup>2</sup>) was equipped with Ag/AgCl QRCEs and filled with 0.1 M HCl. Data extracted from Movie S2 were used to construct Figure 3a in the main text. The data presented are not interpolated.

**Movie S3.** Spatially-resolved electrochemical (*current–time, i–t*) movie (49 × 29 pixels over a 120 × 70 μm<sup>2</sup> area, hopping distance = 2.5 μm) obtained with the amperometric (pulse time = 10 seconds) hopping mode SECCM configuration (shown in the main text, Figure 1), visualizing local proton transmission through a “damaged area” of a graphene|Nafion membrane. The micropipet probe (tip area ≈ 2 μm<sup>2</sup>) was equipped with Ag/AgCl QRCEs and filled with 0.1 M HCl. Data extracted from Movie S3 were used to construct Figure 4a-i in the main text. The data presented are not interpolated.

**Movie S4.** Spatially-resolved electrochemical (*i–t*) movie (49 × 29 pixels over a 125 × 70 μm<sup>2</sup> area, hopping distance = 2.5 μm) obtained with the amperometric (pulse time = 10 seconds) hopping mode SECCM configuration (shown in the main text, Figure 1), visualizing local proton transmission through a more pristine area of a graphene|Nafion membrane. The micropipet probe (tip area ≈ 2 μm<sup>2</sup>) was equipped with Ag/AgCl QRCEs and filled with 0.1 M HCl. Data extracted from Movie S4 were used to construct Figure 4a-ii in the main text. The data presented are not interpolated.

## TOPOGRAPHICAL MAPS

(a) SECCM: Electrochemistry

(b) SECCM: Topography

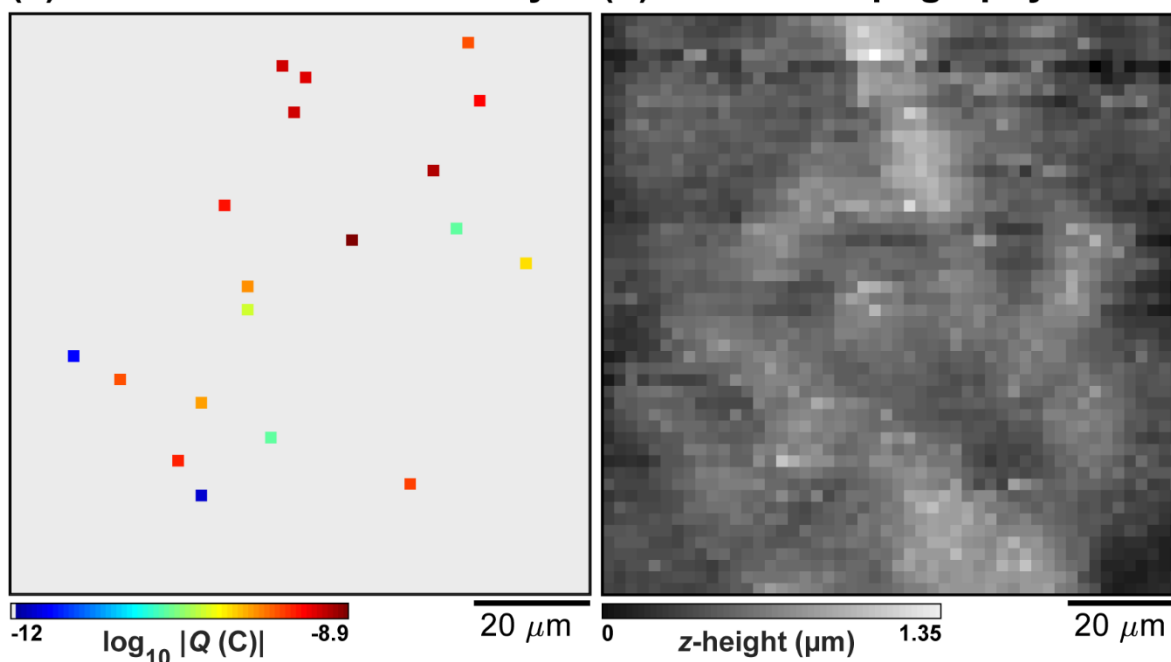

(c) Overlay [(a) on (b)]

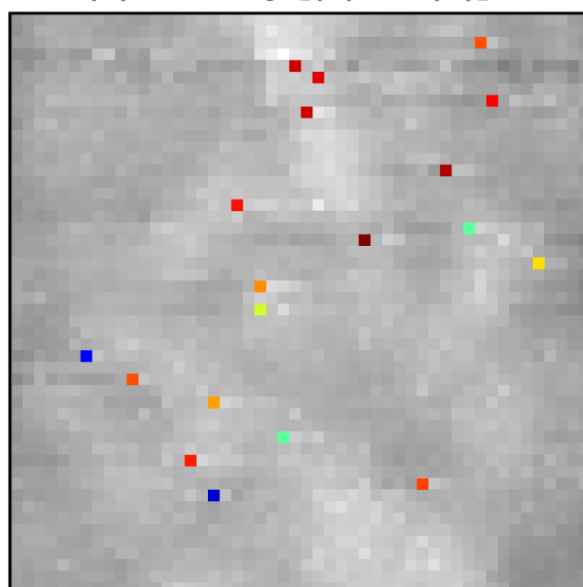

**Figure S3.** (a) Electrochemical activity ( $\log_{10}|Q|$ ) and (b) co-located topographical maps (measured synchronously), collected over a  $100 \times 100 \mu\text{m}^2$  area of a graphene|Nafion membrane, using SECCM in the voltammetric ( $\nu = 0.1 \text{ V s}^{-1}$ , 1 cycle,  $E_{\text{surf}} = -0.225$  to  $0.175 \text{ V vs. Ag/AgCl}_{\text{QRCE}}$ ) hopping mode configuration (hopping distance =  $2 \mu\text{m}$ ,  $51 \times 51$  pixels). (c) Overlay of (a) on (b). Note that SI, Figure S3a is reproduced from Figure 2a in the main text.

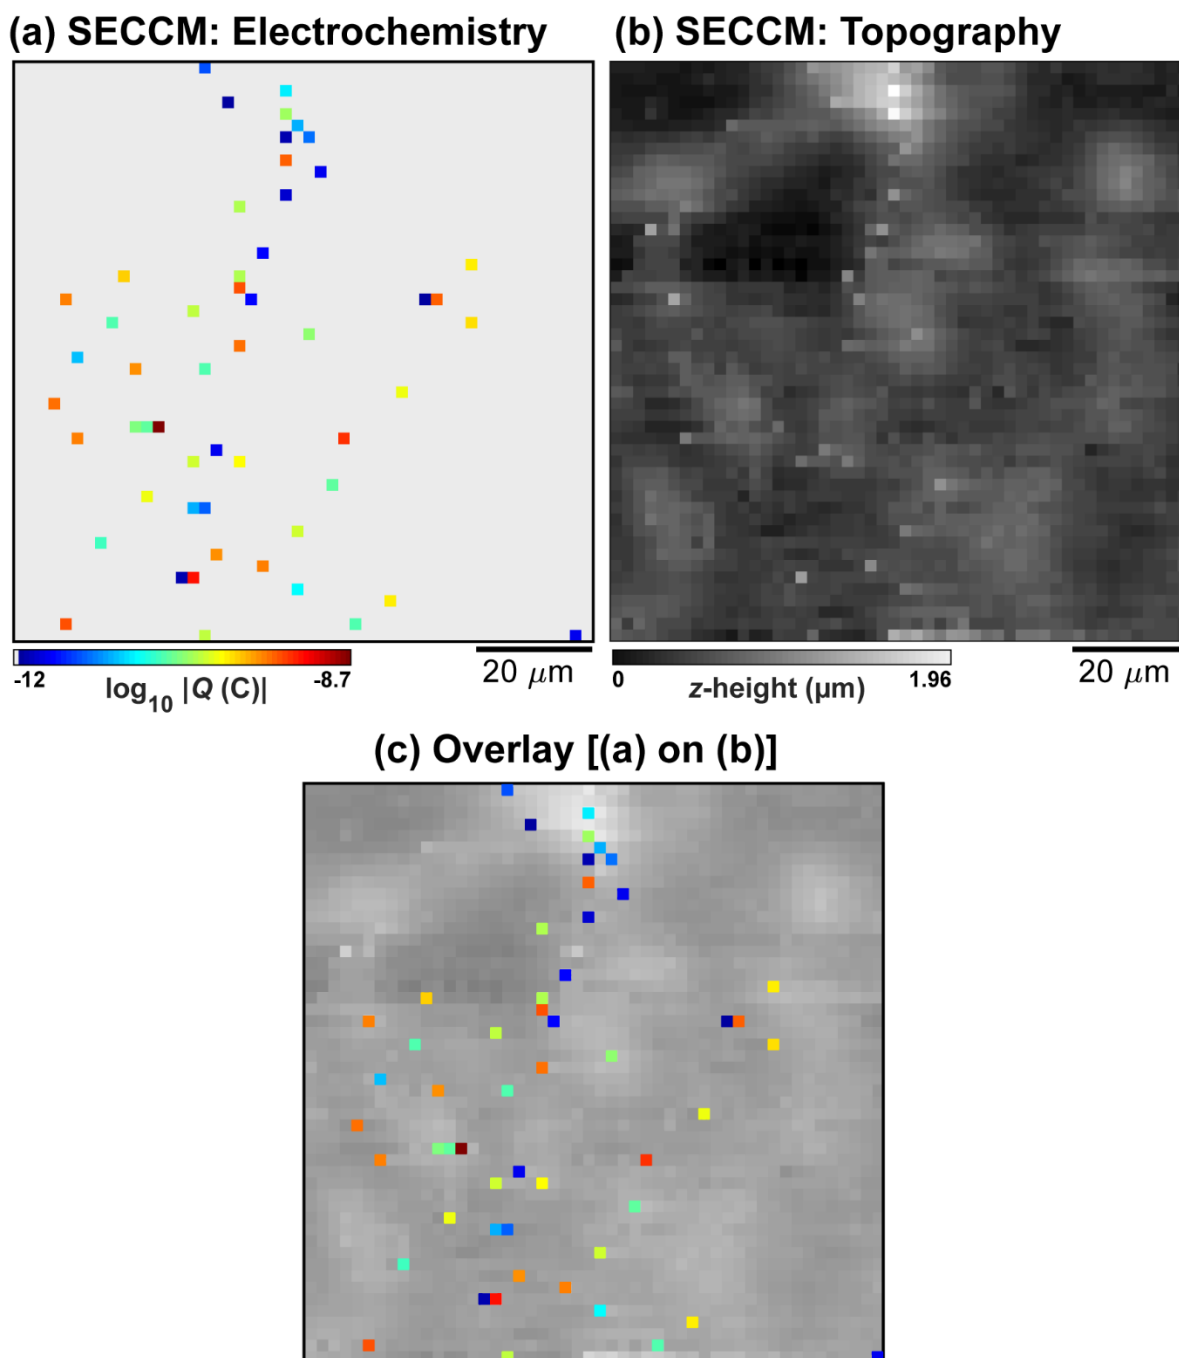

**Figure S4.** (a) Electrochemical activity ( $\log_{10}|Q|$ ) and (b) co-located topographical maps (measured synchronously), collected over a  $100 \times 100 \mu\text{m}^2$  area of a graphene|Nafion membrane, using SECCM in the voltammetric ( $\nu = 0.2 \text{ V s}^{-1}$ , 2 cycles,  $E_{\text{surf}} = -0.225$  to  $0.175 \text{ V vs. Ag/AgCl}_{\text{QRCE}}$ ) hopping mode configuration (hopping distance =  $2 \mu\text{m}$ ,  $51 \times 51$  pixels). (c) Overlay of (a) on (b). Note that SI, Figure S4a is reproduced from Figure 3a in the main text.



## OVERPOTENTIAL, CAPACITANCE AND RC TIME CONSTANT

**Overpotential ( $\eta$ ).** The overpotential ( $\eta$ ) is defined as:<sup>3</sup>

$$\eta = E - E_{\text{eq}} \quad (\text{S1})$$

where  $E_{\text{eq}}$  is the equilibrium potential. The hydrogen evolution reaction (HER), *i.e.*,  $\text{H}^+/\text{H}_2$  process, by definition, possesses an  $E_{\text{eq}}$  value of 0 V vs. RHE (reversible hydrogen electrode), which is related to the SHE (standard hydrogen electrode) as follows:

$$E_{\text{RHE}} = E_{\text{SHE}} - 0.059 \cdot \text{pH} \quad (\text{S2})$$

As the HER is taking place at the Pt WE, the pH value here refers to that of the Nafion 211 membrane, which is taken to be  $\approx -0.1$  (Refs 6-8). In 0.1 M HCl, the Ag/AgCl QRCEs are poised at:

$$E_{\text{QRCE}} = E^{0'} - \frac{RT}{F} \ln[\text{Cl}^-] \approx 0.281 \text{ V vs. SHE} \quad (\text{S3})$$

Thus,  $-0.5 \text{ V vs. Ag/AgCl}_{\text{QRCE}}$  translates to  $\approx -0.2 \text{ V vs. RHE}$  or  $\eta = 0.2 \text{ V}$ .

**Double layer capacitance ( $C_{\text{dl}}$ ).**  $C_{\text{dl}}$  arises from the charging of the electrical double layer at the macroscopic Pt WE and therefore is not necessarily limited to the dimensions of meniscus-surface contact. Indeed, a previous study has shown that in low-frequency AC measurements (*i.e.*, on the ms to s timescale), the nanopipet “senses” the capacitance of an electrode area that is orders-of-magnitude larger than the dimensions of the probe tip itself.<sup>9</sup>  $C_{\text{dl}}$  was estimated from the nonfaradaic charging current measured by landing the SECCM probe directly on the Nafion, exposed at damaged areas of the graphene|Nafion membrane; a representative cyclic voltammogram (CV) is shown in Figure S5. From the nonfaradaic current ‘envelope’ (marked  $2 \cdot i_c$  in Figure S5),  $C_{\text{dl}}$  can be estimated as follows:

$$C_{\text{dl}} = \frac{i_c}{\nu} \quad (\text{S4})$$

where  $\nu$  is voltammetric scan rate. From  $i_c \approx 0.2 \text{ nA}$  and  $\nu = 0.1 \text{ V s}^{-1}$ ,  $C$  is estimated to be  $\approx 2 \text{ nF}$ . As a rough estimate, if it is assumed that the Pt WE has a specific capacitance of  $20 \mu\text{F cm}^{-2}$  (typical for a metal electrode in aqueous solution<sup>3</sup>),  $2 \text{ nF}$  corresponds to an electrode area of  $\approx 10^{-4} \text{ cm}^2$ . This means

that the area of the Pt WE that contributes to  $C_{dl}$  is *ca.* 4 orders-of-magnitude larger than that of the area of meniscus contact (*ca.*  $1 - 2 \mu\text{m}^2$ ), consistent with the previous report described above.<sup>9</sup>

**RC time constant ( $\tau$ ).** The RC time constant ( $\tau$ ) is the product of the series resistance ( $R_{\text{series}}$ ) and double layer capacitance ( $C_{dl}$ ). As described in detail in the main text, over an active proton transmission site,  $R_{\text{series}} \approx R_{\text{pore}} \approx 100$  to  $1000 \text{ M}\Omega$ , giving rise to  $\tau$  values of 0.2 to 2 s. Assuming a simple RC series circuit, for a potential-step experiment, the non-faradaic current ( $i_{\text{nf}}$ ) decays exponentially with  $t$  as follows:

$$i_{\text{nf}} = \frac{E}{R} e^{-t/\tau} \quad (\text{S5})$$

Thus,  $i_{\text{nf}}$  drops to 5% of its initial value at  $t = 3\tau$ , meaning it can be effectively neglected at  $t > 6 \text{ s}$  (assuming  $\tau = 2 \text{ s}$ ).

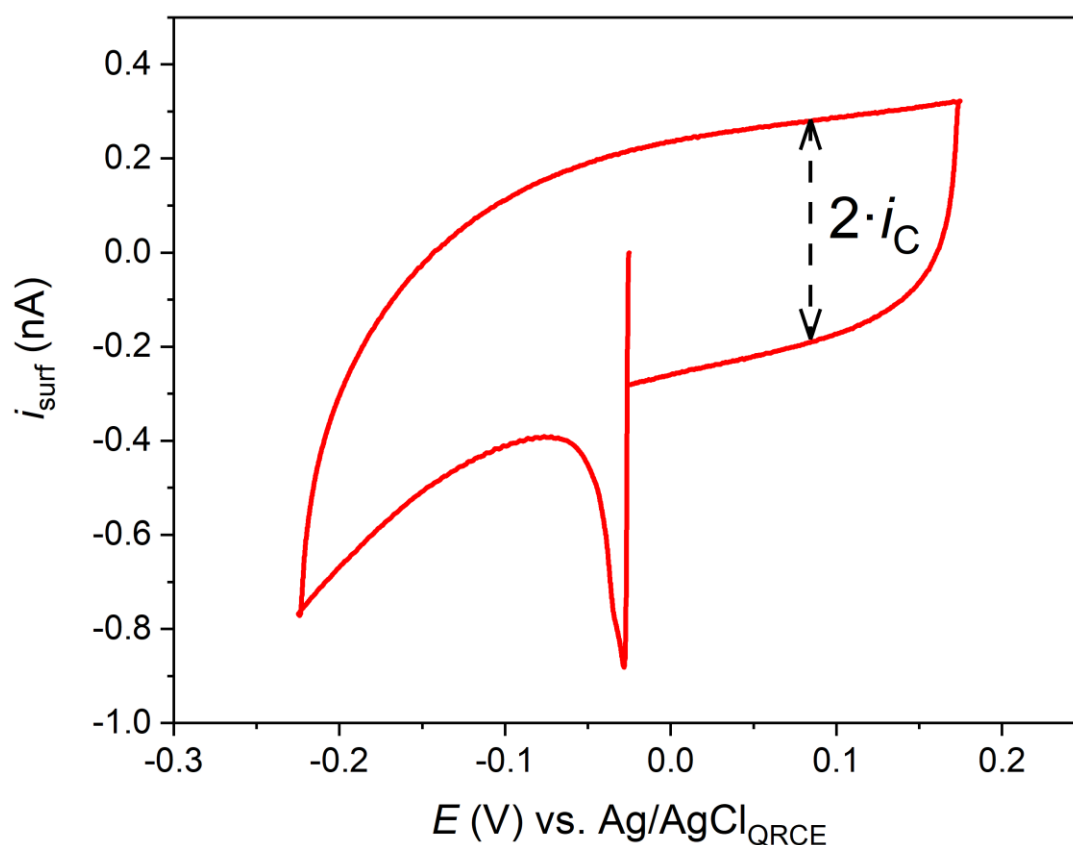

**Figure S5.** Representative CV ( $\nu = 0.1 \text{ V s}^{-1}$ , 1 cycle,  $E_{\text{surf}} = -0.225$  to  $0.175 \text{ V vs. Ag/AgCl}_{\text{QRCE}}$ ), obtained in the SECCM format by landing the micropipet probe directly on the Nafion 211 film (exposed at a damaged area of the graphene|Nafion membrane). This curve is the average of 10 independent measurements. These data were collected with a dual-channel micropipet probe of tip area  $\approx 1 \mu\text{m}^2$ , equipped with Ag/AgCl QRCEs and filled with 0.1 M HCl.

## EQUIVALENT CIRCUIT: ION TRANSPORT THROUGH A NANOPORE

Analogizing proton conduction through local transmission “sites” on the graphene | Nafion membranes to ion transport through an atomically-thin, cylindrical nanopore,<sup>10, 11</sup> the equivalent circuit model<sup>12, 13</sup> schematized in Figure S6 was derived.

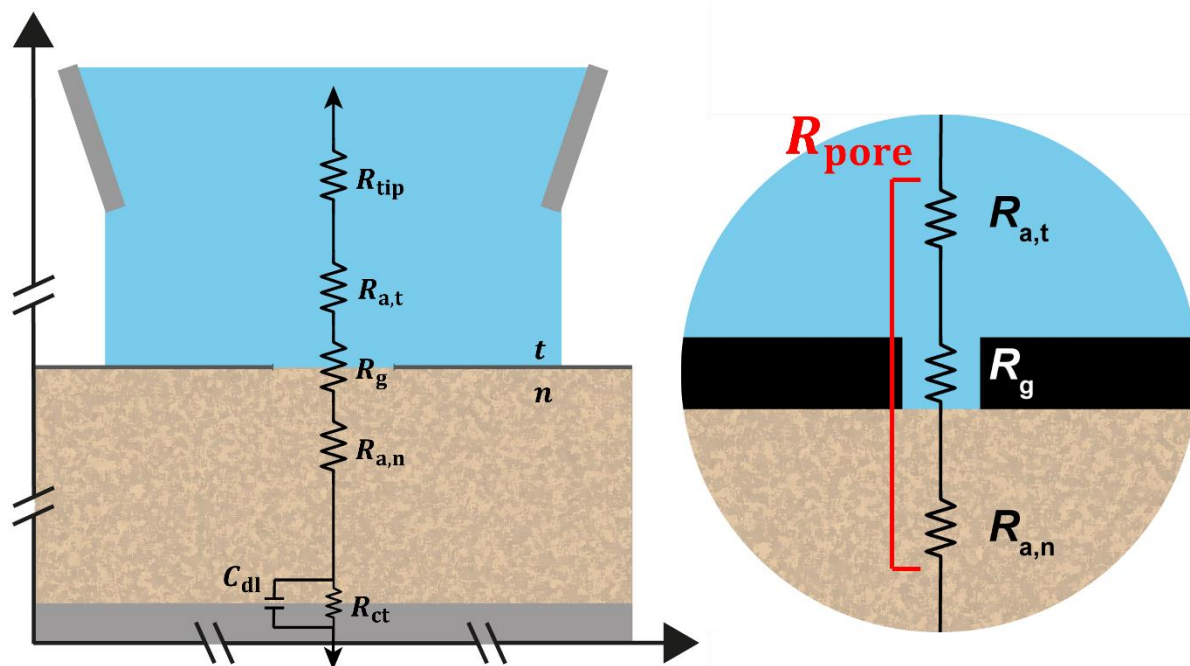

**Figure S6.** Equivalent circuit representing local proton transmission through graphene|Nafion membranes. The transmission site is analogized to a cylindrical nanopore (zoomed in on right) in the graphene overlayer film.  $R_{tip}$  = tip resistance;  $R_a$  = access resistance;  $R_g$  = geometric resistance;  $R_{pore}$  = pore resistance;  $R_{ct}$  = charge-transfer resistance and;  $C_{dl}$  = double layer capacitance. Note that  $R_{pore} = R_{a,t} + R_g + R_{a,n}$  (shown on right). The subscripts  $t$  and  $n$  refer to the tip and Nafion sides of the graphene film, respectively.

Beginning from the top of Figure S6,  $R_{tip}$  is the resistance of the micropipet tip, which is known to depend on the inner cone angle ( $\beta$ ) and tip radius ( $r_t$ ) according to:

$$R_{tip} \approx \frac{\rho}{\pi r_t \tan \beta} + \frac{\rho}{4r_t} \quad (S6)$$

where  $\rho$  is the solution resistivity. In practice,  $R_{tip}$  can be estimated from using Ohm's law, by measuring an current-voltage curve in the scanning ion conductance microscopy (SICM)

configuration.<sup>14</sup> Alternatively, when using a dual-channel probe,  $R_{\text{tip}}$  can be readily estimated as follows:

$$R_{\text{tip}} \approx \frac{E_{\text{bias}}}{i_{\text{dc}}} \quad (\text{S7})$$

where  $E_{\text{bias}}$  is the bias voltage that is applied between the Ag/AgCl quasi-reference counter electrodes (QRCEs) located in the two channels and  $i_{\text{dc}}$  is the ion conductance current that flows through the meniscus located at the end of the probe.

$R_a$  is the access resistance, which refers to the resistance through solution from electrodes (*i.e.*, QRCE and WE) to pore aperture, and depends on the pore radius (assuming a circular pore of radius,  $r_p$ ) as follows:<sup>10, 11</sup>

$$R_{a,t} = \frac{\rho_t}{4r_p} \quad (\text{S8})$$

$$R_{a,n} = \frac{\rho_n}{4r_p} \quad (\text{S9})$$

Note that the subscripts  $t$  and  $n$  refer to the *tip* (*i.e.*, 0.1 M HCl) and *Nafion* sides of the graphene film, respectively.  $R_g$  is the geometric resistance, which is proportional to the length ( $L_p$ ) and inversely proportional to the area ( $\pi r_p^2$ ) of nanopore, as follows:<sup>10, 11</sup>

$$R_g = \frac{\rho_p L_p}{\pi r_p^2} \quad (\text{S10})$$

Note that the subscript  $p$  signifies properties of the pore itself. Assuming  $\rho_t = \rho_n = \rho_p = \rho$  (*vide infra*), consolidating Eqs. (S8) – (S10) gives the following (Figure S6):

$$R_{\text{pore}} = \frac{\rho L_p}{\pi r_p^2} + \frac{\rho}{2r_p} \quad (\text{S11})$$

where  $R_{\text{pore}}$  is the pore resistance. From Eq. (S11), pores with a high aspect ratio (*i.e.*,  $r_p < L_p$ ) give a pore-dominated response (*i.e.*,  $R_g > R_p$ ), whereas pores with a low aspect ratio ( $r_p > L_p$ ) give an access-dominated response (*i.e.*,  $R_g < R_p$ ). Monolayer graphene is atomically thin, with  $L_p$  estimated to be in the  $\approx 0.34$  nm (*i.e.*, van der Waals diameter of carbon atoms) to  $\approx 1$  nm range,<sup>10</sup> taken to be  $\approx 0.6$  nm,

herein.<sup>15</sup> Thus, for atomic-scale proton transmission sites ( $r_p \approx L_p$ ), both  $R_g$  and  $R_p$  contribute to overall pore resistance ( $R_{\text{pore}}$ ), whereas for lower aspect ratio or nanoscale sites ( $r_p > L_p$ ),  $R_{\text{pore}} \approx R_a$ .

$R_{\text{ct}}$  is the charge transfer resistance (or activation resistance), which scales inversely with the heterogeneous electron-transfer rate constant associated with the Faradaic charge-transfer reaction taking place at the Pt WE [e.g., oxygen reduction reaction (ORR), HER etc.].  $R_{\text{ct}}$  is in parallel with  $C_{\text{dl}}$ , which is the double layer capacitance, arising from the charging of the electrical double layer on the macroscopic Pt WE.<sup>3</sup> Note that because the Ag/AgCl process is kinetically facile, and the potential of the QRCE is fixed during measurement,<sup>16</sup>  $R_{\text{ct}}$  and  $C_{\text{dl}}$  on the Ag/AgCl QRCEs (not shown in Scheme 1) can be neglected.<sup>3</sup>

In principle, the pore geometry (*i.e.*,  $r_p$ ) can be estimated if  $R_{\text{pore}}$  is known, *i.e.*, rearranging Eq. (S11) gives:

$$r_p = \frac{\pi\rho + \sqrt{\pi^2\rho^2 + 16\pi \cdot R_{\text{pore}} \cdot \rho \cdot L_p}}{4\pi \cdot R_{\text{pore}}} \quad (\text{S12})$$

In practice,  $R_{\text{pore}}$  can only be estimated simply from the series resistance ( $R_{\text{series}}$ ) under conditions where the contributions from  $C_{\text{dl}}$  and  $R_{\text{ct}}$  are negligible (*i.e.*,  $R_{\text{series}} \approx R_{\text{tip}} + R_{\text{pore}}$ ; see Figure S6). By applying a potential-step (*e.g.*, main text, Figure 4) waveform, rather than a potential-sweep (*e.g.*, main text, Figures 2 and 3), the capacitive contribution to the measured surface current ( $i_{\text{surf}}$ ) can be effectively neglected after a time of  $3\tau$  (*i.e.*, where the double layer charging current drops to 5% of its initial value<sup>3</sup>), which is >6 seconds, assuming  $\tau = 2$  s (*vide supra*).  $R_{\text{ct}}$  can be effectively neglected under conditions of facile electron-transfer, which can be readily achieved herein by only considering the kinetically facile HER (rather than the kinetically sluggish ORR) at a strongly driving overpotential ( $\eta$ ). Indeed, it is the rapid electron-transfer kinetics of the  $\text{H}^+/\text{H}_2$  process at Pt electrodes that enables them to be used in conventional electrochemical hydrogen pump cells to quantify (bulk) proton transport in proton exchange membrane fuel cells.<sup>17</sup>

Thus, during a potential-step experiment at  $t > 6$  s and a strong driving (over)potential of  $\eta = 0.2$  V (ca.  $-0.5$  V vs. Ag/AgCl, calculation detailed above),  $R_{\text{series}}$  reduces to:

$$R_{\text{series}} \approx R_{\text{tip}} + R_{\text{pore}} \approx \frac{\eta}{i_{\text{surf}}} \quad (\text{S13})$$

and rearranging for  $R_{\text{pore}}$ :

$$R_{\text{pore}} \approx \frac{\eta}{i_{\text{surf}}} - R_{\text{tip}} \quad (\text{S14})$$

Thus, as discussed in the main text,  $R_{\text{pore}}$  can be readily estimated from  $i_{\text{surf}}$  and  $R_{\text{tip}}$  [Eq. (S7)], allowing the pore geometry ( $r_p$ ) to be estimated.

As noted above, in the derivation of Eq. (S11), was assumed that  $\rho_t = \rho_n = \rho_p = \rho$ . While the bulk conductivities of 0.1 M HCl ( $\approx 0.04$  S  $\text{cm}^{-1}$ , Ref 18) and Nafion ( $\approx 0.02 - 0.06$  S  $\text{cm}^{-1}$ , Ref 19) are comparable (*i.e.*,  $\rho_t = \rho_n$ ), the local conductivity of the latter is structure-dependent on the nanoscale (*e.g.*, see Figure S2) and the environment inside the pore (*i.e.*,  $\rho_p$ ) is also likely to be significantly different to the surrounding solutions. Given this, along a number of other assumptions [*e.g.*, assuming continuum ion transport and ignoring the effects of ion dehydration, interactions with surface charge(s) within the pore and structural fluctuations (flexibility) in the membrane<sup>10</sup>], the pore geometries ( $r_p$ ) estimated in the main text from Eq. (S12) should be taken *cum grano salis*.

## MACROSCOPIC AREAL CONDUCTIVITY OF GRAPHENE MEMBRANES

**Table S1.** Reported areal conductivity values of graphene membranes

| G/A (S cm <sup>-2</sup> ) | Preparation method / ≈membrane area                       | Reference | Equivalent defect density (defects μm <sup>-2</sup> ) <sup>†</sup> |
|---------------------------|-----------------------------------------------------------|-----------|--------------------------------------------------------------------|
| 0.003                     | Exfoliated graphene / ≈μm <sup>2</sup>                    | 20        | 0.005                                                              |
| 0.004                     | CVD graphene / ≈μm <sup>2</sup>                           | 21        | 0.007                                                              |
| ≈0.09                     | CVD graphene-on-Nafion / ≈cm <sup>2</sup>                 | 22        | ≈0.2                                                               |
| ≈0.6                      | H <sub>2</sub> plasma-treated graphene / ≈μm <sup>2</sup> | 21        | ≈1                                                                 |
| ≈1                        | Disordered graphene / ≈μm <sup>2</sup>                    | 23        | ≈2                                                                 |
| ≈1                        | CVD graphene-on-Nafion / ≈cm <sup>2</sup>                 | 24        | ≈2                                                                 |
| ≈30                       | CVD graphene-on-Nafion / ≈cm <sup>2</sup>                 | 25        | ≈50                                                                |

<sup>†</sup>defects μm<sup>-2</sup> = areal conductivity (S cm<sup>-2</sup>) · 170 · 10<sup>6</sup> (Ω · defect) / 10<sup>8</sup> (cm<sup>2</sup> μm<sup>-2</sup>)

## ELECTRON MICROSCOPY IMAGES OF SECCM PROBES

**(a) Main text, Figure 2 – 4**

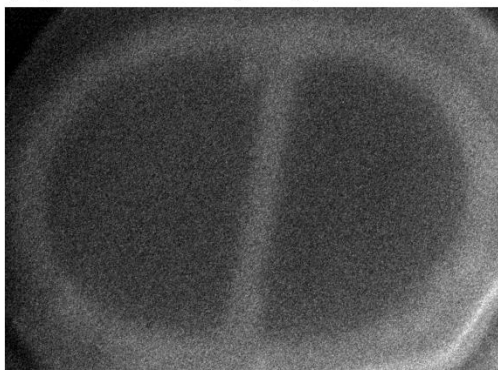

400 nm

**(b) Main text, Figure 5**

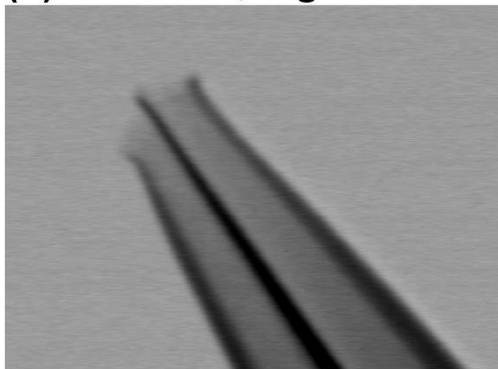

100 nm

**(c) SI, Figure S1**

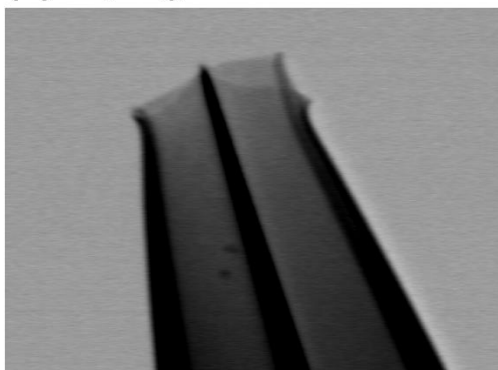

200 nm

**Figure S7.** Representative electron microscopy images of the pipet probes used in **(a)** main text, Figures 2 – 4; **(b)** main text, Figure 5 and; **(c)** SI, Figure S1. **(a)** was taken in scanning electron microscopy (SEM) mode, and **(b)/(c)** were taken in scanning transmission electron microscopy (STEM) mode on a GeminiSEM 500 system.



## XPS CHARACTERIZATION OF GRAPHENE | NAFION MEMBRANES

(a) Nafion: survey

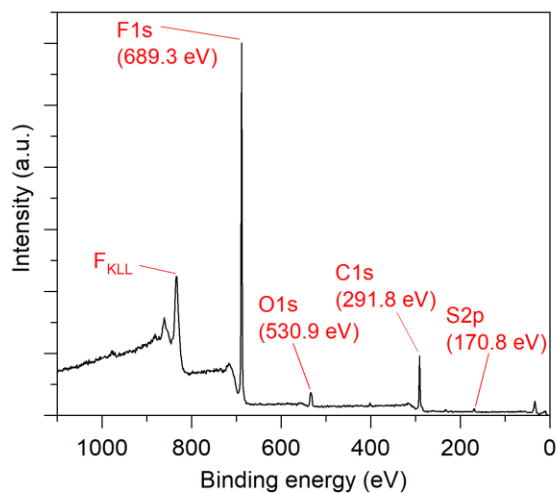

(b) Nafion: C1s

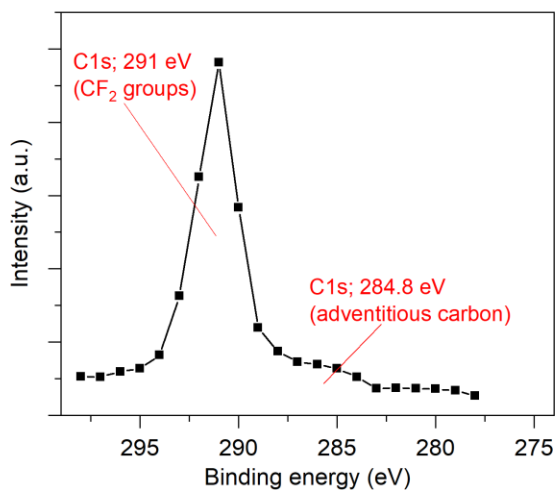

(c) graphene|Nafion: survey

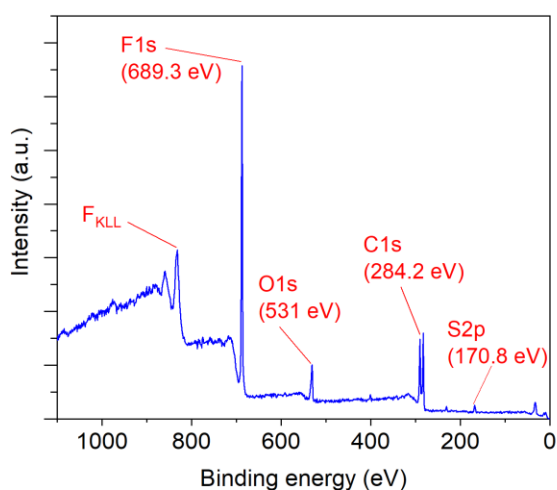

(d) graphene|Nafion: C1s

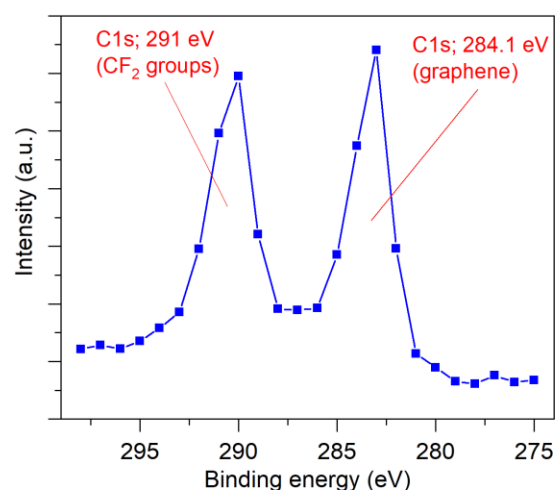

**Figure S8.** X-ray photoelectron spectroscopy (XPS) spectra obtained from Nafion [(a) survey and (b) C1s] and graphene|Nafion [(c) survey and (d) C1s] membranes.

**Table S2.** Atomic composition of Nafion and graphene|Nafion membranes, quantified by XPS.

| element | atomic % |                 |
|---------|----------|-----------------|
|         | Nafion   | graphene Nafion |
| F1s     | 57.7     | 33              |
| C1s     | 33.8     | 58              |
| O1s     | 7.5      | 8               |
| S2p     | 1        | 0.9             |

## SI REFERENCES

1. Snowden, M. E.; Güell, A. G.; Lai, S. C. S.; McKelvey, K.; Ebejer, N.; O'Connell, M. A.; Colburn, A. W.; Unwin, P. R., Scanning Electrochemical Cell Microscopy: Theory and Experiment for Quantitative High Resolution Spatially-Resolved Voltammetry and Simultaneous Ion-Conductance Measurements. *Anal. Chem.* **2012**, *84* (5), 2483-2491.
2. Ebejer, N.; Güell, A. G.; Lai, S. C. S.; McKelvey, K.; Snowden, M. E.; Unwin, P. R., Scanning Electrochemical Cell Microscopy: A Versatile Technique for Nanoscale Electrochemistry and Functional Imaging. *Annu. Rev. Anal. Chem.* **2013**, *6*, 329-351.
3. Bard, A. J.; Faulkner, L. R., *Electrochemical Methods : Fundamentals and Applications*. 2nd ed.; Wiley: New York, 2001; p 833.
4. Daviddi, E.; Chen, Z.; Massani, B. B.; Lee, J.; Bentley, C. L.; Unwin, P. R.; Ratcliff, E. L., Nanoscale Visualization and Multiscale Electrochemical Analysis of Conductive Polymer Electrodes. *ACS Nano* **2019**, *13* (11), 13271-13284.
5. Güell, A. G.; Cuharuc, A. S.; Kim, Y.-R.; Zhang, G.; Tan, S.-y.; Ebejer, N.; Unwin, P. R., Redox-Dependent Spatially Resolved Electrochemistry at Graphene and Graphite Step Edges. *ACS Nano* **2015**, *9* (4), 3558-3571.
6. Umeda, M.; Sayama, K.; Maruta, T.; Inoue, M., Proton Activity of Nafion 117 Membrane Measured from Potential Difference of Hydrogen Electrodes. *Ionics* **2013**, *19* (4), 623-627.
7. Spry, D. B.; Fayer, M. D., Proton Transfer and Proton Concentrations in Protonated Nafion Fuel Cell Membranes. *J. Phys. Chem. B* **2009**, *113* (30), 10210-10221.
8. Seger, B.; Vinodgopal, K.; Kamat, P. V., Proton Activity in Nafion Films: Probing Exchangeable Protons with Methylene Blue. *Langmuir* **2007**, *23* (10), 5471-5476.
9. Shkirskiy, V.; Kang, M.; McPherson, I. J.; Bentley, C. L.; Wahab, O. J.; Daviddi, E.; Colburn, A. W.; Unwin, P. R., Electrochemical Impedance Measurements in Scanning Ion Conductance Microscopy. *Anal. Chem.* **2020**, *92* (18), 12509-12517.
10. Sahu, S.; Zwolak, M., Colloquium: Ionic Phenomena in Nanoscale Pores through 2D Materials. *Rev. Mod. Phys.* **2019**, *91* (2), 021004.
11. Hyun, C.; Rollings, R.; Li, J., Probing Access Resistance of Solid-State Nanopores with a Scanning-Probe Microscope Tip. *Small* **2012**, *8* (3), 385-392.
12. Zhang, Z.-Y.; Deng, Y.-S.; Tian, H.-B.; Yan, H.; Cui, H.-L.; Wang, D.-Q., Noise Analysis of Monolayer Graphene Nanopores. *Int. J. Mol.* **2018**, *19* (9), 2639.
13. Kowalczyk, S. W.; Grosberg, A. Y.; Rabin, Y.; Dekker, C., Modeling the Conductance and DNA Blockade of Solid-State Nanopores. *Nanotechnology* **2011**, *22* (31), 315101.

14. Perry, D.; Momotenko, D.; Lazenby, R. A.; Kang, M.; Unwin, P. R., Characterization of Nanopipettes. *Anal. Chem.* **2016**, *88* (10), 5523-5530.
15. Garaj, S.; Hubbard, W.; Reina, A.; Kong, J.; Branton, D.; Golovchenko, J. A., Graphene as a Subnanometre Trans-Electrode Membrane. *Nature* **2010**, *467* (7312), 190-3.
16. Bentley, C. L.; Perry, D.; Unwin, P. R., Stability and Placement of Ag/AgCl Quasi-Reference Counter Electrodes in Confined Electrochemical Cells. *Anal. Chem.* **2018**, *90* (12), 7700-7707.
17. Huth, A.; Schaar, B.; Oekermann, T., A "Proton Pump" Concept for the Investigation of Proton Transport and Anode Kinetics in Proton Exchange Membrane Fuel Cells. *Electrochim. Acta* **2009**, *54* (10), 2774-2780.
18. Creager, S., 3 - Solvents and Supporting Electrolytes. In *Handbook of Electrochemistry*, Zoski, C. G., Ed. Elsevier: Amsterdam, 2007; pp 57-72.
19. Peron, J.; Mani, A.; Zhao, X.; Edwards, D.; Adachi, M.; Soboleva, T.; Shi, Z.; Xie, Z.; Navessin, T.; Holdcroft, S., Properties of Nafion® NR-211 Membranes for PEMFCs. *J. Membr. Sci.* **2010**, *356* (1-2), 44-51.
20. Hu, S.; Lozada-Hidalgo, M.; Wang, F. C.; Mishchenko, A.; Schedin, F.; Nair, R. R.; Hill, E. W.; Boukhvalov, D. W.; Katsnelson, M. I.; Dryfe, R. A. W.; Grigorieva, I. V.; Wu, H. A.; Geim, A. K., Proton Transport through One-Atom-Thick Crystals. *Nature* **2014**, *516*, 227.
21. Chaturvedi, P.; Vlassioux, I. V.; Cullen, D. A.; Rondinone, A. J.; Lavrik, N. V.; Smirnov, S. N., Ionic Conductance through Graphene: Assessing Its Applicability as a Proton Selective Membrane. *ACS Nano* **2019**, *13* (10), 12109-12119.
22. Lozada-Hidalgo, M.; Zhang, S.; Hu, S.; Esfandiari, A.; Grigorieva, I. V.; Geim, A. K., Scalable and Efficient Separation of Hydrogen Isotopes Using Graphene-Based Electrochemical Pumping. *Nat. Comm.* **2017**, *8* (1), 15215.
23. Griffin, E.; Mogg, L.; Hao, G.-P.; Kalon, G.; Bacaksiz, C.; Lopez-Polin, G.; Zhou, T. Y.; Guarochico, V.; Cai, J.; Neumann, C.; Winter, A.; Mohn, M.; Lee, J. H.; Lin, J.; Kaiser, U.; Grigorieva, I. V.; Suenaga, K.; Özyilmaz, B.; Cheng, H.-M.; Ren, W., *et al.*, Proton and Li-Ion Permeation through Graphene with Eight-Atom-Ring Defects. *ACS Nano* **2020**, *14* (6), 7280-7286.
24. Bukola, S.; Beard, K.; Korzeniewski, C.; Harris, J. M.; Creager, S. E., Single-Layer Graphene Sandwiched between Proton-Exchange Membranes for Selective Proton Transmission. *ACS Appl. Nano Mater.* **2019**, *2* (2), 964-974.
25. Bukola, S.; Liang, Y.; Korzeniewski, C.; Harris, J.; Creager, S., Selective Proton/Deuteron Transport through Nafion|Graphene|Nafion Sandwich Structures at High Current Density. *J. Am. Chem. Soc.* **2018**, *140* (5), 1743-1752.
